# Supplementary material for: Aptamer-Targeted Plasmonic Photothermal Therapy of Cancer
Source: PubMed Central journal article supplement (PMC5582647; doi:10.1016/j.omtn.2017.08.007), 2017-08-16
Supplement: mmc1.pdf [file mmc1.pdf]

## Supplemental Information

### Aptamer-Targeted Plasmonic

### Photothermal Therapy of Cancer

**Olga S. Kolovskaya, Tatiana N. Zamay, Irina V. Belyanina, Elena Karlova, Irina Garanzha, Aleksandr S. Aleksandrovsky, Andrey Kirichenko, Anna V. Dubynina, Alexey E. Sokolov, Galina S. Zamay, Yury E. Glazyrin, Sergey Zamay, Tatiana Ivanchenko, Natalia Chanchikova, Nikolay Tokarev, Nikolay Shepelevich, Anastasia Ozerskaya, Evgeniy Badrin, Kirill Belugin, Simon Belkin, Vladimir Zabluda, Ana Gargaun, Maxim V. Berezovski, and Anna S. Kichkailo**

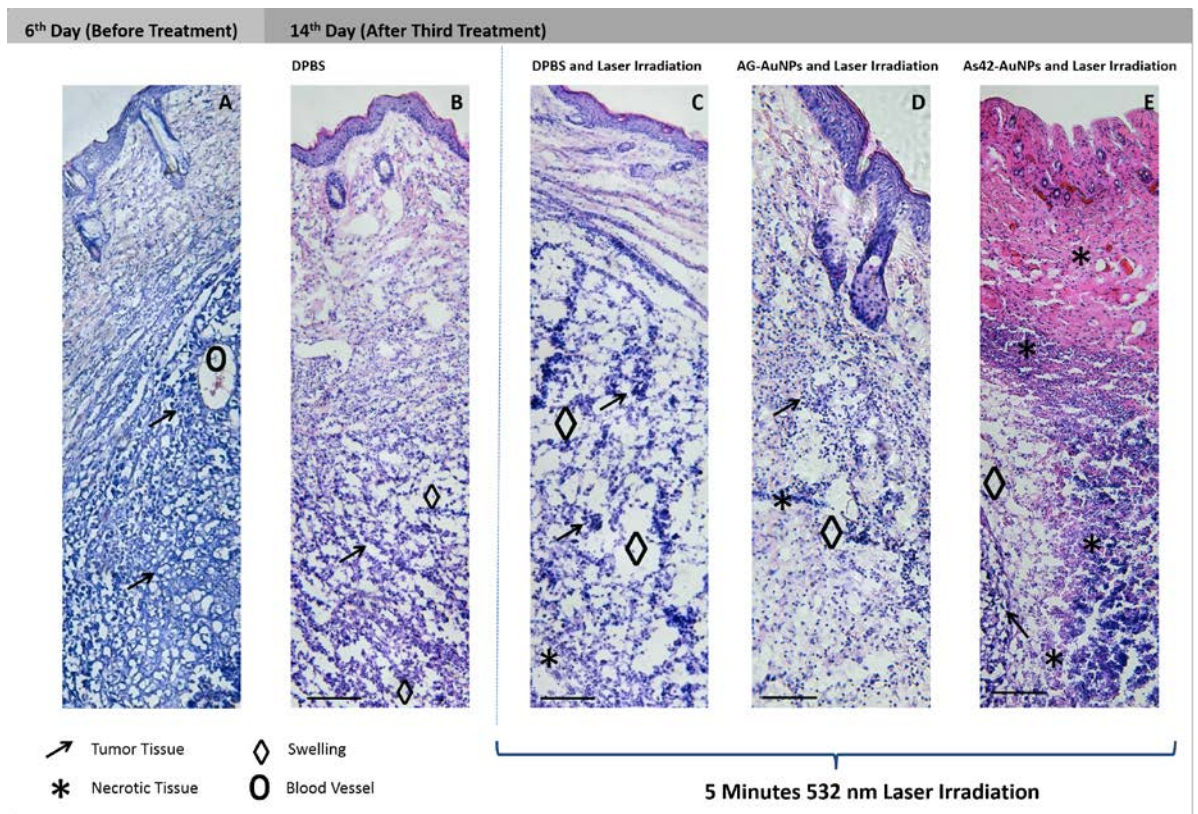

**Figure 1S.** General view of histopathological changes of solid Ehrlich carcinoma assessed by H&E staining before PPT treatment (A), after tail vein injection of DPBS (B, C), AG-AuNPs (D), AS42-AuNPs (E) after 5 min of laser irradiation at 1.2 Watts. Magnification $\times 50$ .
